# Supplementary material
Source: MDPI journal article supplement (https://www.mdpi.com/2073-4344/10/11/1290)
Supplement: s1 [file s1]

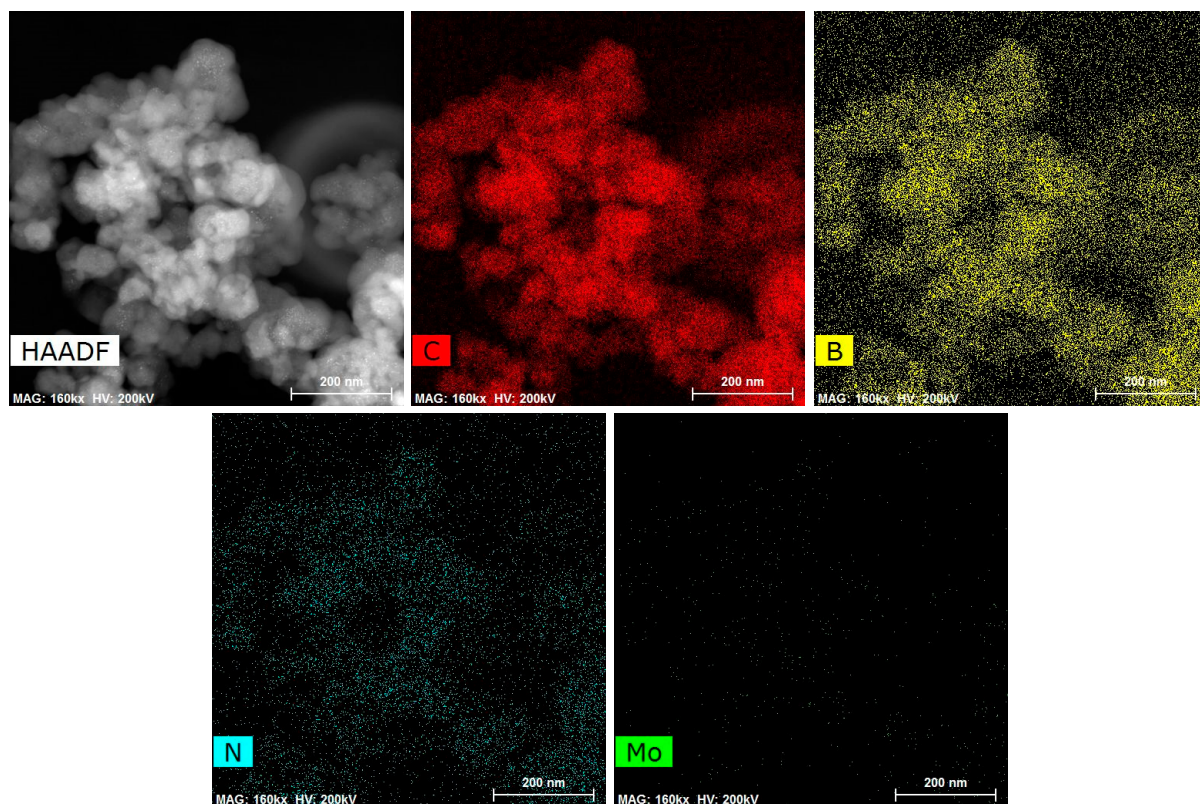

Figure S1. EDS images of 800 MoC-BN/C in TEM.

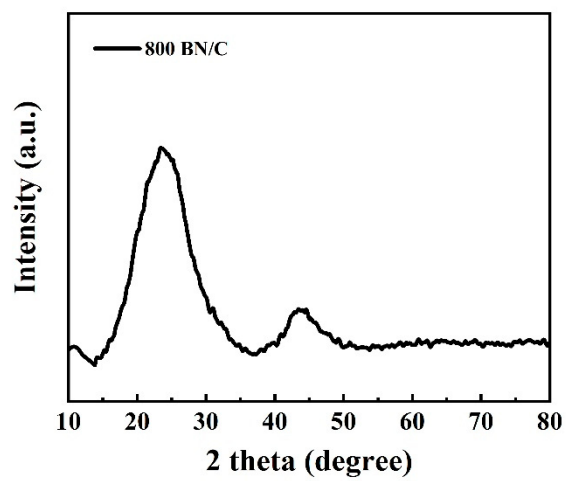

Figure S2. XRD pattern of 800 BN/C

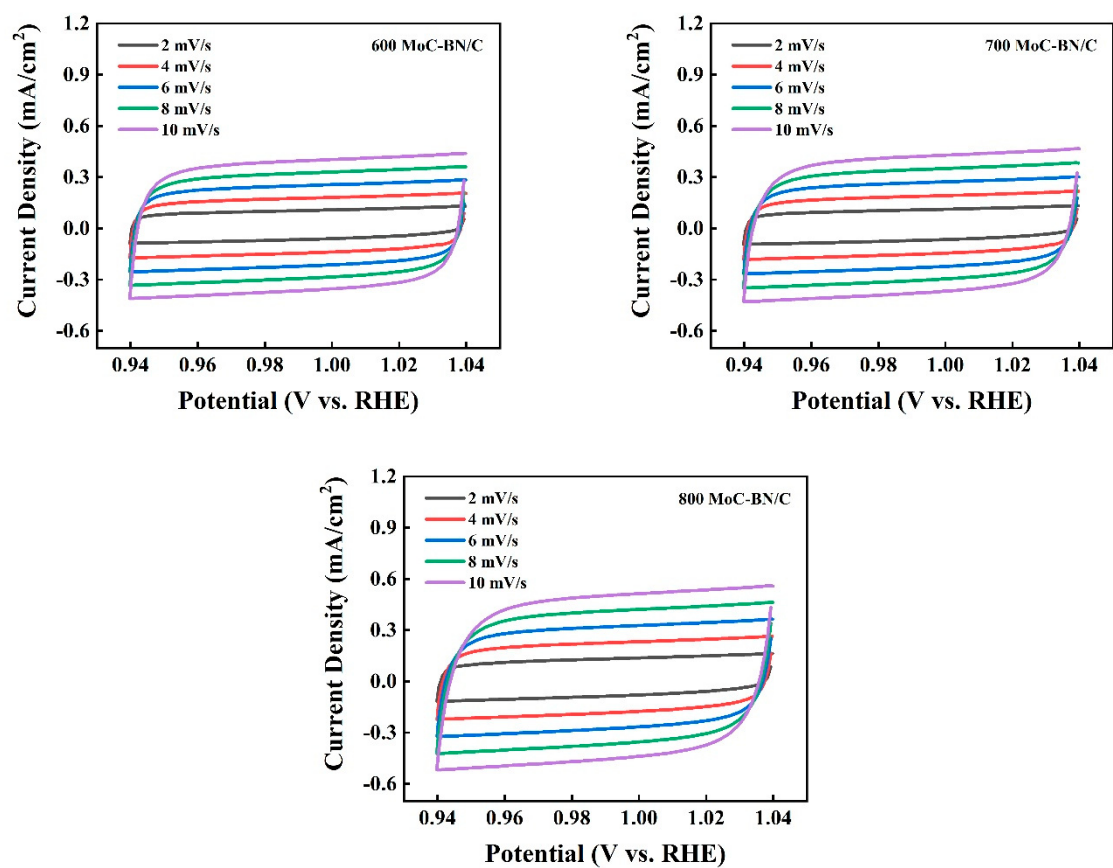

**Figure S3.** CV graphs of 600, 700, and 800 MoC-BN/C to identify the electrochemically active surface area
